# Supplementary material for: (Ba0.55Sr0.45)1−xLaxTi1.01O3-Bi0.5Na0.5TiO3 Positive Temperature Coefficient Resistivity Ceramics with Low Curie Temperature (~−15 °C)
Source: MDPI journal article supplement (doi:10.3390/ma17081812), 2024-04-15
Supplement: s1 [file s1]

*Supplementary Materials*

# **(Ba<sub>0.55</sub>Sr<sub>0.45</sub>)<sub>1-x</sub>La<sub>x</sub>Ti<sub>1.01</sub>O<sub>3</sub>-Bi<sub>0.5</sub>Na<sub>0.5</sub>TiO<sub>3</sub> Positive Temperature Coefficient Resistivity Ceramics with Low Curie Temperature (~-15 °C)**

**Wanlu Xu, Wenwu Wang, Xiaoshan Zhang and Ping Yu \***

College of Materials Science and Engineering, Sichuan University, Chengdu  
610064, China; skylar82@163.com (W.X.); www1492@163.com (W.W.);  
zhills0206@hotmail.com (X.Z.)

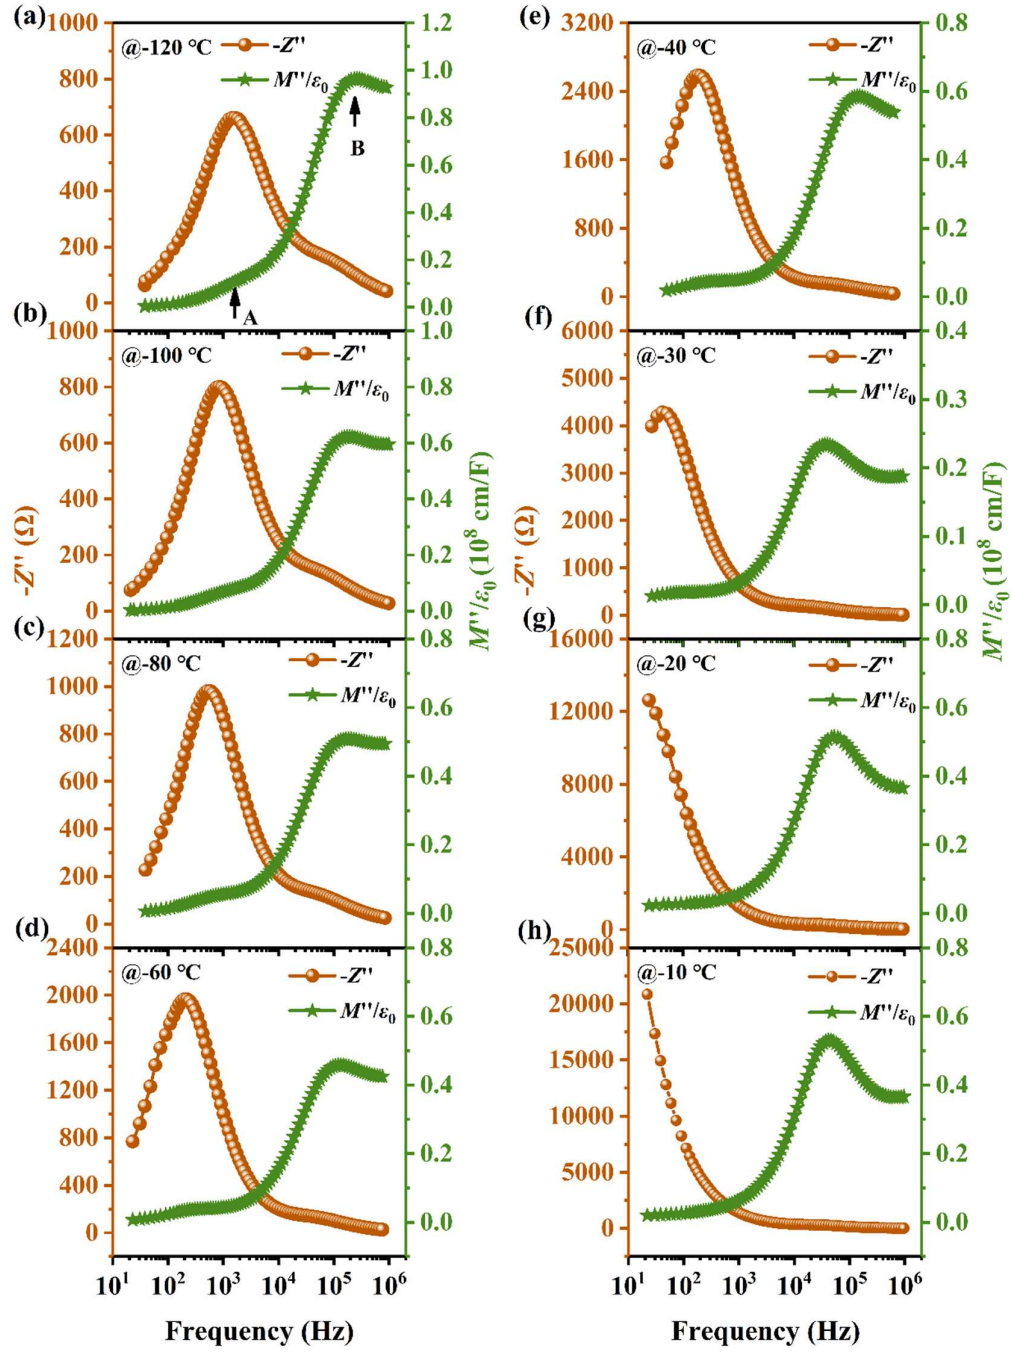

**Figure S1.** Impedance  $Z''$  and modulus  $M''$  spectroscopic plots at different temperatures for  $(\text{Ba}_{0.55}\text{Sr}_{0.45})_{0.99875}\text{La}_{0.00125}\text{Ti}_{1.01}\text{O}_3-0.0025\text{BNT}$  ceramic at different temperatures.
